# Supplementary material for: Mapping cellular Fe–S cluster uptake and exchange reactions – divergent pathways for iron–sulfur cluster delivery to human ferredoxins
Source: Royal Society of Chemistry journal article supplement (doi:10.1039/c6mt00193a), 2016-01-01
Supplement: c6mt00193a1.pdf [file c6mt00193a1.pdf]

## Supplementary Materials

### Mapping Cellular Fe-S Cluster Uptake and Exchange Reactions - Divergent Pathways for Iron-Sulfur Cluster Delivery to Human Ferredoxins

Insiya Fidai,<sup>1,2†</sup> Christine Wachnowsky,<sup>1,3†</sup> and J. A. Cowan<sup>1,2,3\*</sup>

From the <sup>1</sup> Department of Chemistry and Biochemistry, The Ohio State University, 100 West 18<sup>th</sup> Avenue, Columbus, Ohio 43210; <sup>2</sup> The Biophysics Graduate Program, The Ohio State University; and <sup>3</sup> The Ohio State Biochemistry Program, The Ohio State University.

<sup>†</sup> **Author contributions:** IF and CW contributed equally to this project.

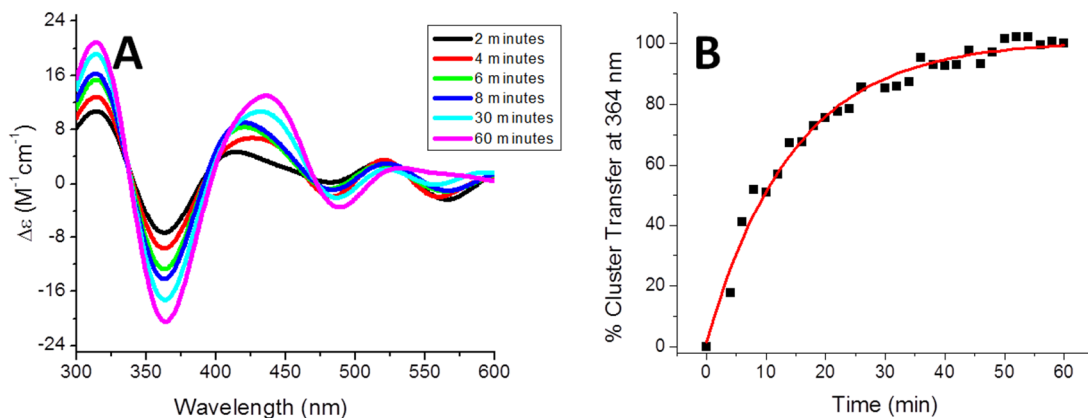

**FIGURE S1.** (A) Time course measurement for cluster transfer from  $[2\text{Fe-2S}]^{2+}$  holo human Nfu to apo *Hs* Grx2 ( $50\ \mu\text{M}$  each) was monitored by UV-visible CD spectroscopy under anaerobic conditions in semi-micro 1 cm cuvettes at room temperature. UV-visible CD spectra were recorded every 2 min for 60 min after addition of the cluster bound form of Nfu to apo Grx2. (B) The kinetics of appearance of the holo Grx2 CD signal following the cluster transfer from holo Nfu to apo Grx2 was also monitored. The cluster transfer reactions were carried out with a 1:1 donor:acceptor cluster stoichiometry in the presence of 3 mM GSH. The change in extinction values are based on the initial  $[2\text{Fe-2S}]^{2+}$  cluster concentration. An apparent second order rate constant of  $2000 \pm 150\ \text{M}^{-1}\ \text{min}^{-1}$  was obtained.

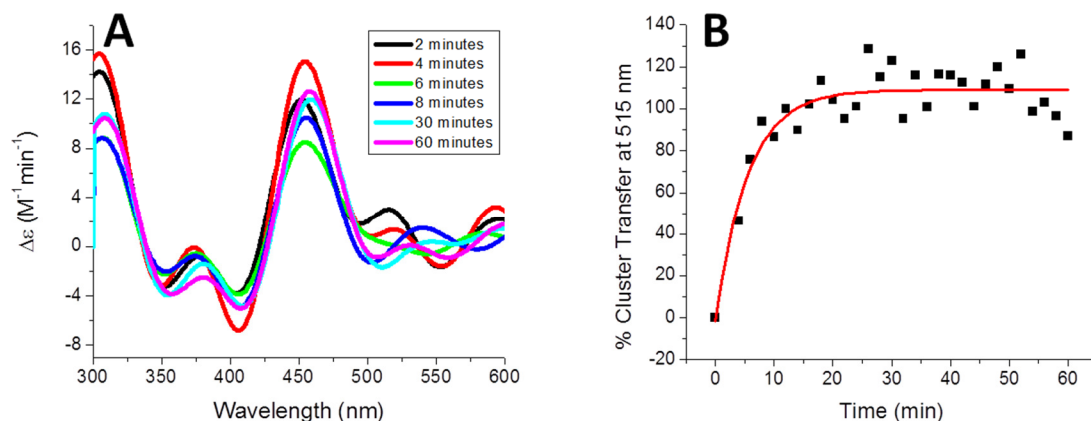

**FIGURE S2.** (A) Time course measurement for cluster transfer from  $[2\text{Fe-2S}]^{2+}$  holo *S. pombe* Isa1 to apo *S. cerevisiae* Grx3 (120  $\mu\text{M}$  each) was monitored by UV-visible CD spectroscopy under anaerobic conditions in semi-micro 1 cm cuvettes at room temperature. UV-visible CD spectra were recorded every 2 min for 60 min after addition of the cluster bound form of Isa1 to apo Grx3. (B) The kinetics of appearance of the holo Isa1 CD signal following cluster transfer from holo Isa1 to apo Grx3 was also monitored. The cluster transfer reactions were carried out with a 1:1 donor:acceptor cluster stoichiometry in the presence of 3 mM GSH. The change in extinction values are based on the initial  $[2\text{Fe-2S}]^{2+}$  cluster concentration. An apparent second order rate constant of  $6200 \pm 1900 \text{ M}^{-1} \text{ min}^{-1}$  was obtained.

**TABLE S1:** Second order rate constants for all the transfer reactions demonstrated in this work and previous work from our laboratory.

| <b>Transfer Reaction</b>                                                            | <b>Rate (M<sup>-1</sup> min<sup>-1</sup>)</b> |
|-------------------------------------------------------------------------------------|-----------------------------------------------|
| Holo <i>Hs</i> IscU to apo <i>Hs</i> Fdx1                                           | 8700 ± 590                                    |
| Holo <i>Hs</i> IscU to apo <i>Hs</i> Fdx2                                           | 2400 ± 1400                                   |
| Holo <i>S. pombe</i> Isa1 to apo <i>Hs</i> Fdx1                                     | 6500 ± 1970                                   |
| Holo <i>S. pombe</i> Isa1 to apo <i>Hs</i> Fdx2                                     | 8500 ± 2380                                   |
| Holo <i>S. cerevisiae</i> Grx3 to apo <i>Hs</i> Fdx1                                | 2100 ± 500                                    |
| Holo <i>S. cerevisiae</i> Grx3 to apo <i>Hs</i> Fdx2                                | 695 ± 138                                     |
| Holo <i>Hs</i> Grx2 to apo <i>Hs</i> Fdx1                                           | 1160 ± 200                                    |
| Holo <i>S. pombe</i> Isa1 to apo <i>Hs</i> Grx2                                     | 3500 ± 1300                                   |
| Holo <i>S. pombe</i> Isa1 to apo <i>Hs</i> IscU                                     | 2900 ± 600                                    |
| Holo <i>S. pombe</i> Isa1 to apo <i>Hs</i> Nfu                                      | 6700 ± 1560                                   |
| Holo <i>S. pombe</i> Isa1 to apo <i>S. cerevisiae</i> Grx3                          | 6200 ± 1900                                   |
| Holo <i>Hs</i> Nfu to apo <i>Hs</i> Fdx1                                            | 4695 ± 823 <sup>1</sup>                       |
| Holo <i>Hs</i> Nfu to apo <i>Hs</i> Fdx2                                            | 3849 ± 1242 <sup>1</sup>                      |
| Holo <i>Hs</i> Nfu to apo <i>Hs</i> Grx2                                            | 2000 ± 150                                    |
| [2Fe-2S](GS) <sub>4</sub> to apo <i>Hs</i> Nfu                                      | 1930 ± 212 <sup>1</sup>                       |
| Holo <i>Hs</i> Nfu to form [2Fe-2S](GS) <sub>4</sub> via GSH extraction             | 130 ± 22 <sup>1</sup>                         |
| [2Fe-2S](GS) <sub>4</sub> to apo <i>Hs</i> IscU                                     | 4100 ± 1500 <sup>2</sup>                      |
| Holo <i>Hs</i> IscU to form [2Fe-2S](GS) <sub>4</sub> via GSH extraction            | 40 ± 3.4 <sup>2</sup>                         |
| [2Fe-2S](GS) <sub>4</sub> to apo <i>S. cerevisiae</i> Grx3                          | 1360 ± 110 <sup>2</sup>                       |
| Holo <i>S. cerevisiae</i> Grx3 to form [2Fe-2S](GS) <sub>4</sub> via GSH extraction | 130 ± 27 <sup>2</sup>                         |
| [2Fe-2S](GS) <sub>4</sub> to apo <i>S. pombe</i> Isa1                               | 7400 ± 1500 <sup>2</sup>                      |
| Holo <i>S. pombe</i> Isa1 to form [2Fe-2S](GS) <sub>4</sub> via GSH extraction      | 51 ± 8.5 <sup>2</sup>                         |

## References

1. C. Wachnowsky, I. Fidai and J. A. Cowan, Iron-sulfur cluster exchange reactions mediated by the human Nfu protein, *J. Biol. Inorg. Chem*, 2016, **21**, 825-836.
2. I. Fidai, C. Wachnowsky and J. A. Cowan, Glutathione-complexed [2Fe-2S] clusters function in Fe-S cluster storage and trafficking, *J. Biol. Inorg. Chem*, 2016, **21**, 887-901.
